# Supplementary material
Source: Springer Nature journal article supplement (https://www.springermedizin.de/resource/supplementary/12885_2010_2316_MOESM7_ESM.pdf/9461004)
Supplement: MOESM7 [file 9461004]

A

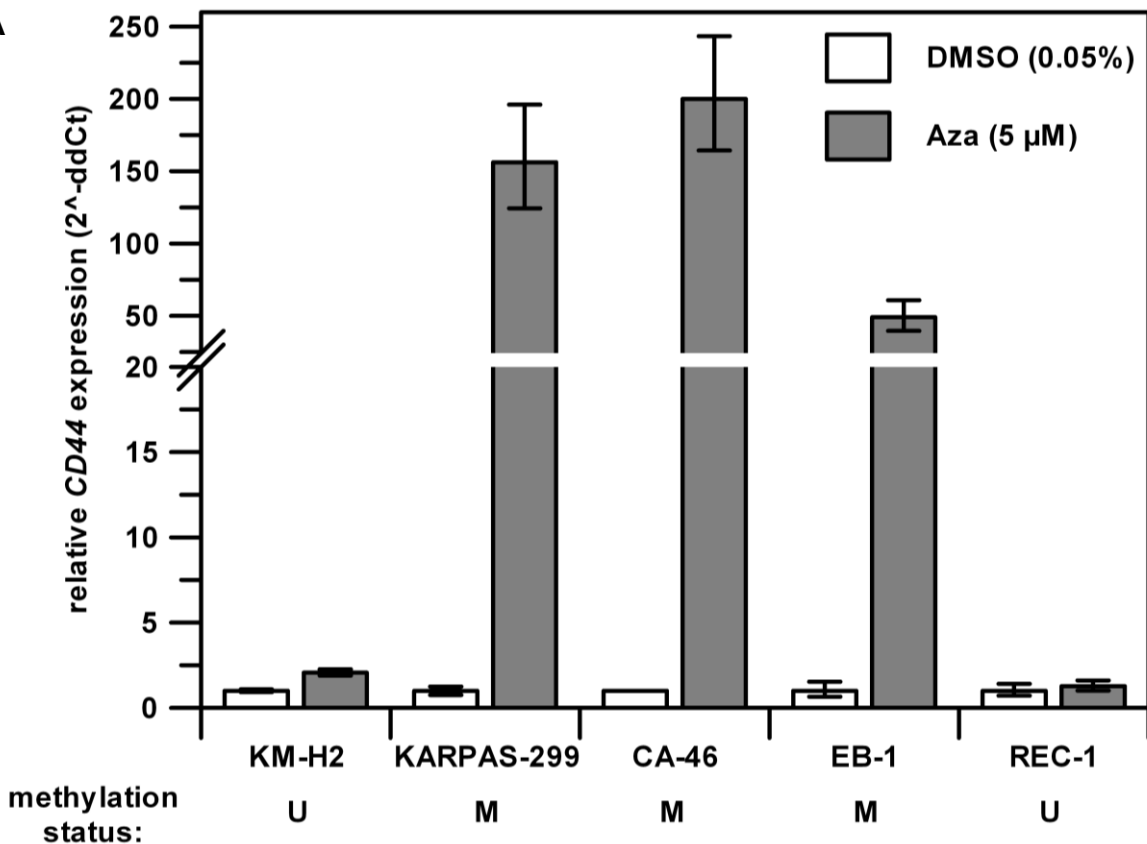

B

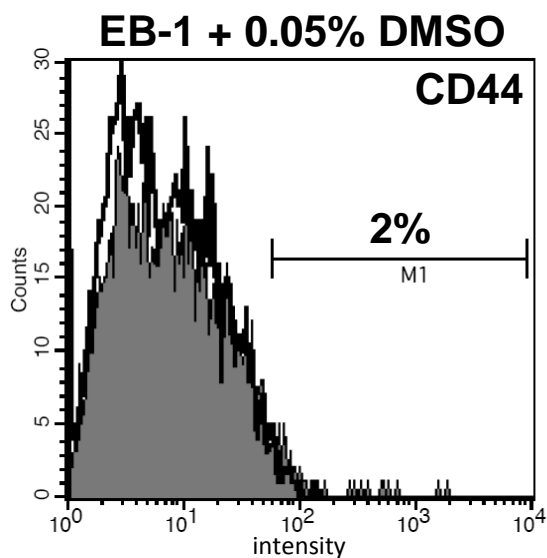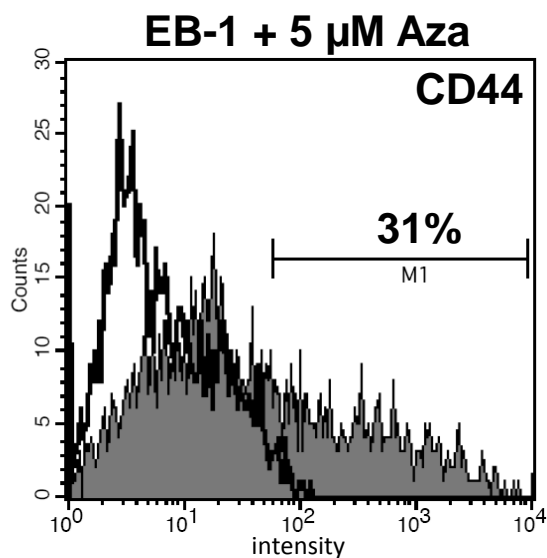

| cell line  | CD44 methylation status | CD44 protein | Induction of CD44 protein by Aza (4d) |
|------------|-------------------------|--------------|---------------------------------------|
| KM-H2      | U                       | Yes          | -                                     |
| KARPAS-299 | M                       | No           | +                                     |
| EB-1       | M                       | No           | ++                                    |
| RAJI       | M                       | No           | +                                     |
